# Supplementary material for: Secondary organic aerosol (SOA) yields from NO 3 radical + isoprene based on nighttime aircraft power plant plume transects
Source: Copernicus journal article supplement (doi:10.5194/acp-18-11663-2018), 2018-08-16
Supplement: Supplementary file 1 [file acp-18-11663-2018-supplement.pdf]

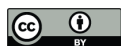

*Supplement of*

## **Secondary organic aerosol (SOA) yields from NO<sub>3</sub> radical + isoprene based on nighttime aircraft power plant plume transects**

**Juliane L. Fry et al.**

*Correspondence to:* Juliane L. Fry (fry@reed.edu)

The copyright of individual parts of the supplement might differ from the CC BY 4.0 License.

In the main text, we noted a discrepancy between overall average aerosol volume estimates based on size measurements vs. AMS for the flight analyzed here (see Figure S1). We checked to see if this bias was also present in the individual plumes studied here by calculating the volume changes from the sizing instruments and the derived volume changes from the AMS+rBC mass. There is quite a bit of scatter in the volume enhancements, with most of the points falling along the same line as the data for this flight. It is unclear why the two types of volume measurements disagree more for this flight. Therefore, the bias in volume changes introduces additional uncertainty in the magnitude of the plume enhancements.

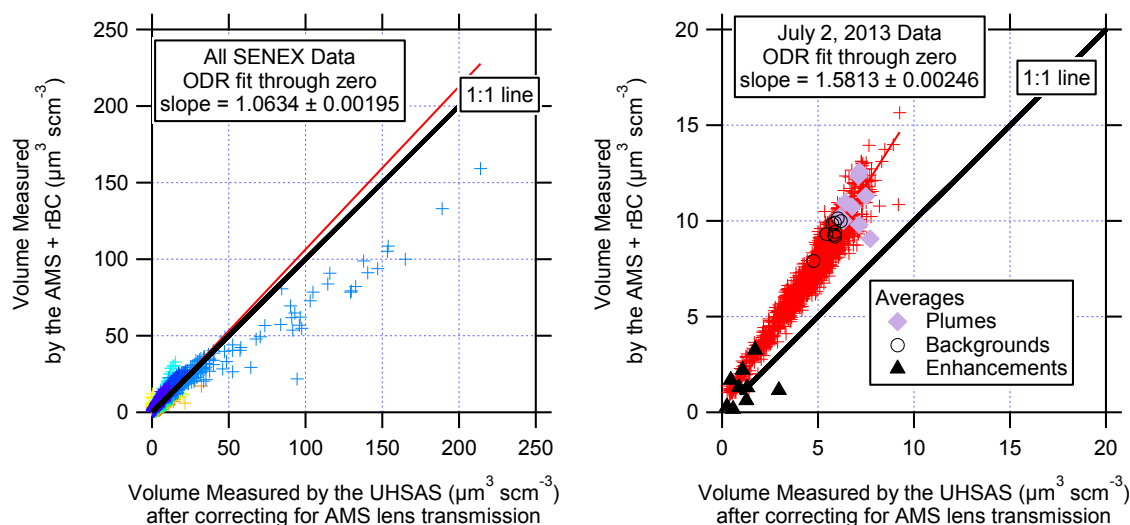

**Figure S1.** Aerosol volume measured using the total aerosol mass from the AMS plus refractory black carbon (rBC) and mass-weighted densities versus the aerosol volume measured by optical size with the UHSAS after correcting for AMS lens transmission. The procedure for calculating the mass-weighted density is described by Bahreini et al. [65]. On average, the measured aerosol volume from composition is roughly equal to the measured aerosol volume from size for the entire SENEX study (left hand panel) and is higher than one for the flight analyzed here (July 2, 2013, right hand panel).

### Corrections for AMS UMR nitrate data and applicability to pRONO<sub>2</sub> estimation

Nitrate in the AMS is quantified in unit mass resolution mode (UMR) as the sum of the estimated NO<sup>+</sup> at *m/z* 30 and NO<sub>2</sub><sup>+</sup> at *m/z* 46, with a correction factor to account for the smaller ions (N<sup>+</sup> and HNO<sub>3</sub><sup>+</sup>, mostly) produced from nitrate [83]. The default AMS UMR quantification algorithm (documented in the AMS “fragmentation table”) estimates NO<sup>+</sup> as the total signal at *m/z* 30 minus a small (2.2% of OA at *m/z* 29, “Org29” in AMS parlance) subtraction to account for organic interferences and an isotopic correction for naturally-occurring <sup>15</sup>N<sub>2</sub> from nitrogen in air. The default UMR fragmentation table was developed for mixed ambient aerosols, in particular in urban studies, and it is the responsibility of each AMS user to correct it as needed for each study. In environments with high biogenic contributions to total OA, and/or low total nitrate concentrations, the contribution of the CH<sub>2</sub>O<sup>+</sup> ion can be much larger than the default

subtraction at  $m/z$  30. Similarly, the  $\text{CH}_2\text{O}_2^+$  ion at  $m/z$  46 becomes non-negligible, and hence nitrate reported from AMS data with UMR resolution will frequently be overestimated in these situations. The poor performance of the default AMS correction is likely due to the initial focus on urban OA with high nitrate fractions when deriving those corrections [83, 84].

Here we derive a set of corrections based on an aircraft high-resolution (HR) dataset acquired with the University of Colorado HR-AMS [85] on the NASA DC-8 during the SEAC<sup>4</sup>RS campaign [86]. SEAC<sup>4</sup>RS took place with a strong emphasis on the SEUS 6 weeks after the SENEX flight analyzed in this manuscript. Based on an initial screening of the correlations of the  $\text{CH}_2\text{O}^+$  and  $\text{CH}_2\text{O}_2^+$  ions with UMR signals, 10 potential UMR  $m/z$  between  $m/z$  29 and  $m/z$  53 were selected as viable for deriving suitable corrections. Further analysis using three specific SEAC<sup>4</sup>RS flights (RF11 on 30 Aug 30<sup>th</sup>, 2013, RF16 on Sep 11<sup>th</sup>, 2013 and RF18 on Sep 16<sup>th</sup>, 2013) that covered a wide range of OA composition with both strong biogenic contributions and fresh and aged biomass plumes showed that only four  $m/z$  (29, 42, 43 and 45) had good enough S/N and robust enough correlations to be used as corrections. Table S1 summarizes the correction coefficients obtained in this analysis, and Figure S2 shows the ability of matching the actual  $\text{NO}^+$  and  $\text{NO}_2^+$  signals (as obtained from high-resolution analysis of these flights) with the corrected UMR procedure. These corrections are applied as:

$$\begin{aligned}\text{UMR NO} &= \text{Signal}(m/z30) - a_i \cdot \text{Signal}(\text{Variable}_i) \\ \text{UMR NO}_2 &= \text{Signal}(m/z 46) - b_i \cdot \text{Signal}(\text{Variable}_i)\end{aligned}$$

with the coefficients  $a_i$  and  $b_i$  as reported in Table S1. It should be noted that in all cases the contributions of  $\text{C}^{18}\text{O}^+$  to  $m/z$  30 need to be subtracted first before applying the correction (which is constrained to the organic  $\text{CO}_2^+$  signal, measured at  $m/z$  44, by the naturally-occurring isotopic ratio and assuming that OA produces  $\text{CO}^+ = \text{CO}_2^+$  [87, 88]. Likewise, the contribution of  $^{13}\text{CO}^+$  to Org29 needs to be subtracted first. It is hence very important for this analysis that the corrections to the AMS frag table to suitably estimate the contribution of gas phase  $\text{CO}_2^+$  to total UMR  $m/z$  44 as well as the baseline correction for  $m/z$  29 be properly applied first [83]. Finally, also note that the corrections using  $m/z$  29 and 43 are rather based on Org29 and Org43, which are standard AMS products that take the OA relative ionization efficiency (RIE) into account.

For the SEAC<sup>4</sup>RS dataset, the corrections amounted to on average subtracting 55% from UMR  $m/z$  30 and 33% from UMR  $m/z$  46. Despite this large subtraction, the corrected data correlates very well with the HR AMS results, with less than 5% deviation in the regression slope between the two datasets.

Although all of the corrections in Table S1 were valid for the SEAC<sup>4</sup>RS data set, for the flight analyzed here we chose Org29 to correct  $m/z$  30 and  $m/z$  45 correction to correct  $m/z$  46 because they were the closest organic signals to the UMR nitrate peaks with organic interferences and may be more valid for other field studies where different types of OA are sampled. After these UMR signals were corrected and the appropriate RIEs and CE were applied, the nitrate mass concentrations in the final data archive for the flight analyzed here were reduced by 0-0.24  $\mu\text{g sm}^{-3}$ , averaging 0.11  $\mu\text{g sm}^{-3}$  or 32%. The corresponding increase in

OA due to the organic interferences in the UMR nitrate had linear dependence on the reported OA mass concentrations ( $r^2 = 0.89$ ) with a slope of 1.3%.

To estimate the fraction of nitrate that is organic nitrate (pRONO<sub>2</sub>) the use of the NO<sub>2</sub><sup>+</sup>/NO<sup>+</sup> ratio with an empirically determined pRONO<sub>2</sub> calibration ratio has been successfully used previously with HR-AMS data [33, 36-38, 47, 67, 89]. Figure S2 summarizes how well the ratio of the corrected UMR *m/z* 30 and 46 signals correlate with the NO<sub>2</sub><sup>+</sup> and NO<sup>+</sup> (and ratios) determined using HR data. As expected, there is considerable scatter at very low nitrate concentrations (which is a considerable part of the dataset, as the time series shows, since the free troposphere was sampled extensively). However, for the predicted pRONO<sub>2</sub> (which is mass-weighted), most of this scatter disappears, and for concentrations above 0.1 µg sm<sup>-3</sup> of nitrate there is good agreement between the HR results and the UMR-corrected pRONO<sub>2</sub>, regardless of the correction chosen. For lower concentrations the scatter is considerably larger, with the Org29 correction providing the best overall agreement. Based on the variability in this dataset for this correction (Org29), we estimate the uncertainty in pRONO<sub>2</sub> fraction apportionment using UMR to be about 30%, in addition to an estimated uncertainty for the apportionment method using HR of 20% [67]. From the comparison of UMR-corrected total nitrate to HR nitrate (not shown), we estimate an additional error of 5% for total nitrate error using these corrections.

As mentioned in the main text, the empirically determined pRONO<sub>2</sub> calibration ratio used for the flight data analyzed here was the ratio of NO<sub>2</sub><sup>+</sup>/NO<sup>+</sup> from the ammonium nitrate calibration aerosols divided by 2.8. This factor was representative of multiple data sets analyzed by Day et al. [67]. The ammonium nitrate NO<sub>2</sub><sup>+</sup>/NO<sup>+</sup> ratio was obtained from the two calibrations on 30 June and 7 July that bracketed the flight on 2 July, as described above. This ratio averaged 0.490. Hence, the organic nitrate NO<sub>2</sub><sup>+</sup>/NO<sup>+</sup> ratio was estimated to be 0.175. The ratio of NO<sub>2</sub><sup>+</sup>/NO<sup>+</sup> from the flight data was then used with the pRONO<sub>2</sub> and ammonium nitrate NO<sub>2</sub><sup>+</sup>/NO<sup>+</sup> calibration ratios to estimate the fraction of the total corrected nitrate mass concentrations that was organic (pRONO<sub>2</sub>) or inorganic (nitrate associated with ammonium or NH<sub>4</sub>NO<sub>3</sub>). Propagating the 30% UMR vs HR uncertainty and 20% apportionment (see above) error on top of the 34% AMS total nitrate measurement uncertainty results in ±50% uncertainties in the derived organic nitrate mass concentrations (and similar for NH<sub>4</sub>NO<sub>3</sub>; however it will depend on the relative contributions of pRONO<sub>2</sub> and NH<sub>4</sub>NO<sub>3</sub> to total nitrate since the absolute concentration errors associated with pRONO<sub>2</sub> - NH<sub>4</sub>NO<sub>3</sub> apportionment should be similar [64]).

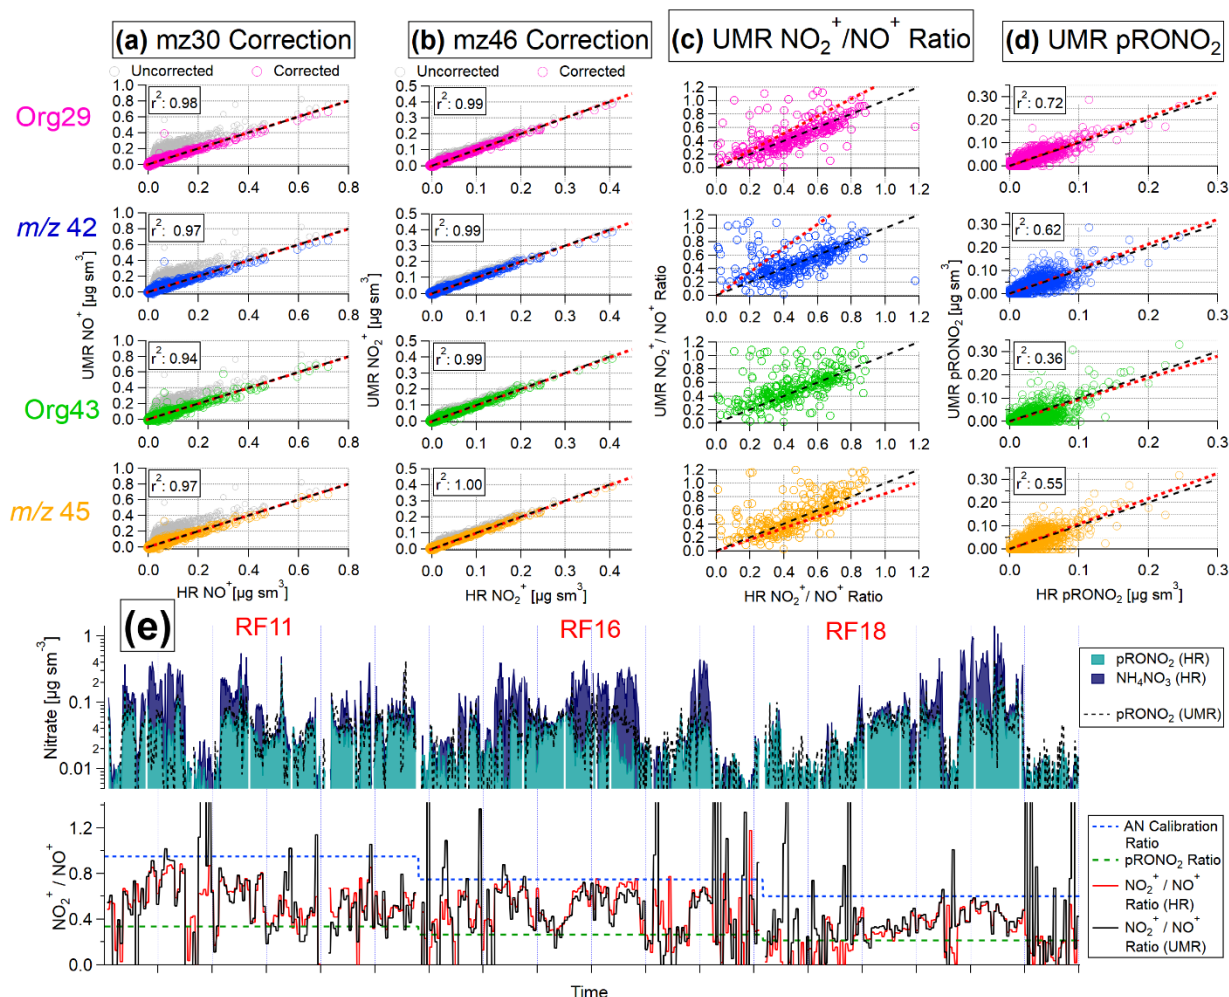

**Figure S2.** (a and b) Comparison of  $m/z$  30 and 46 with the  $\text{NO}^+$  and  $\text{NO}_2^+$  signals from the high resolution analysis of the AMS data before and after applying the four different corrections listed in Table S1. The Pearson  $r^2$  for the corrected dataset is shown as well. (c) Comparison of the  $\text{NO}_2^+/\text{NO}^+$  ratio obtained from HR analysis with the ratios of the corrected UMR NO and  $\text{NO}_2$  variables (d) Comparison of the pRONO<sub>2</sub> concentrations derived using the HR and UMR  $\text{NO}_2^+/\text{NO}^+$  ratios using the method discussed in Day *et al* [67]. (e) Time series of the total and speciated nitrate as reported from HR analysis of the SEAC<sup>4</sup>RS data [90], compared to the speciation using the Org29 correction (note the logarithmic scale). The bottom time series shows the  $\text{NO}_2^+/\text{NO}^+$  ratio that the speciation is based on, again for the HR and corrected UMR case.

**Table S1.** Coefficients used to correct  $m/z$  30 and 46 to estimate total nitrate.

| AMS Variable | Correction coefficient for $m/z$ 30 (a <sub>i</sub> ) | Correction coefficient for $m/z$ 46 (b <sub>i</sub> ) |
|--------------|-------------------------------------------------------|-------------------------------------------------------|
| Org29        | 0.215                                                 | 0.037                                                 |
| $m/z$ 42     | 0.51                                                  | 0.092                                                 |
| Org43        | 0.215                                                 | 0.037                                                 |
| $m/z$ 45     | 0.72                                                  | 0.127                                                 |

1410

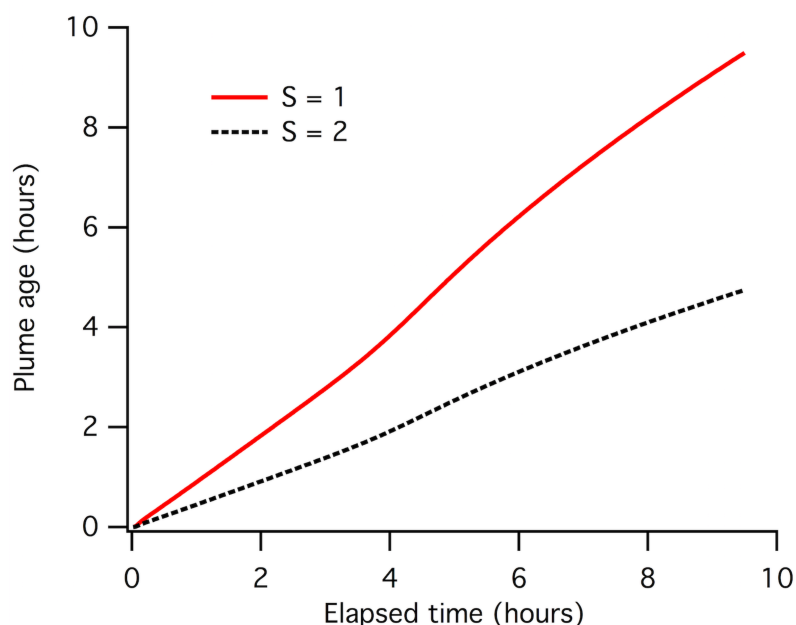

1411 **Figure S3.** Calculated plume age vs. elapsed time in a box model run for a single  
 1412 representative night. Plume ages on the y-axis are calculated based on Equation 1 in the main  
 1413 text but using model  $\text{NO}_2$  and  $\text{O}_3$  data. Time since sunset on the x-axis is the model elapsed  
 1414 time (i.e., run time of the model during darkness).  
 1415  
 1416

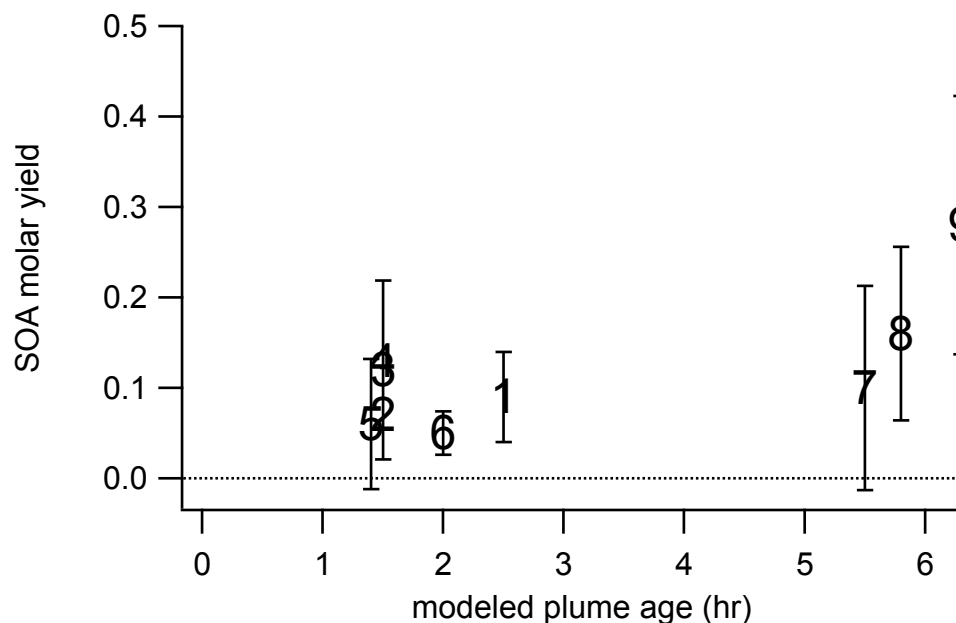

1417 **Figure S4.** SOA molar yield is positively correlated with estimated plume age. This SOA molar  
 1418 yield is based on Eq. 3, with error bars determined by propagation of observed variability in  
 1419  $\text{pRONO}_2$  and isoprene, where multiple point averaging was possible. Markers correspond to  
 1420  
 1421

plume numbers. ). Based on the box model described in more detail below, the first-generation isoprene products peak at a approximately 4 hours plume age and then begin to decay.

**Table S2.** Peak ambient (wet) aerosol surface area during each plume used in the yield analysis (plume numbers 1 – 9), and for the two longer urban plumes transected at the end of the flight.

| plume number | 7/2/13 plume time (UTC) | Peak aerosol surface area ( $\mu\text{m}^2 \text{cm}^{-3}$ ) |
|--------------|-------------------------|--------------------------------------------------------------|
| 1            | 2:18                    | 280                                                          |
| 2            | 2:20                    | 370                                                          |
| 3            | 2:21                    | 470                                                          |
| 4            | 3:03                    | 340                                                          |
| 5            | 3:55                    | 800                                                          |
| 6            | 4:34                    | 470                                                          |
| 7            | 4:37                    | 370                                                          |
| 8            | 4:39                    | 420                                                          |
| 9            | 5:04                    | 490                                                          |
| Urban plume  | 5:36                    | 340                                                          |
| Urban plume  | 6:37                    | 300                                                          |

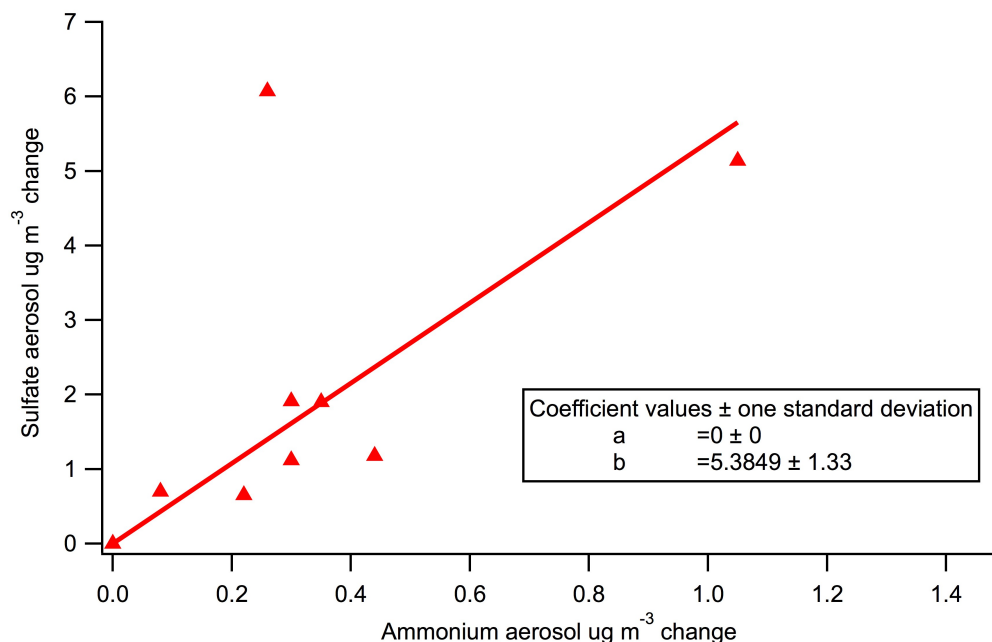

**Figure S5.** In-plume change in sulfate mass concentration vs. change in ammonium aerosol mass concentration is generally well correlated, with a slope of 5.4. The masses of the cations and anions would give an ion balance for pure  $(\text{NH}_4)_2\text{SO}_4$  of  $\text{MW}(\text{SO}_4)/(2 \times \text{MW}(\text{NH}_4)) = 2.7$ , and for  $(\text{NH}_4)\text{HSO}_4$  of  $\text{MW}(\text{SO}_4)/(\text{MW}(\text{NH}_4)) = 5.4$ . Hence, this slope provides support for a mix of these two ammonium sulfate salts, with sometimes exclusively  $(\text{NH}_4)\text{HSO}_4$ . This is consistent with incomplete neutralization of the sulfate mass by ammonium. The one clear outlier (sulfate increase of  $6 \mu\text{g m}^{-3}$  for Plume #5) suggests excess sulfate, rendering ammonium or other inorganic nitrate formation even less likely. Points with ammonium aerosol below  $0.1 \mu\text{g m}^{-3}$  are within the variability of that measurement; their omission does not change the slope.



## Additional AMS and auxiliary data from plumes

**Table S3.** Additional information for the list of plumes used in this NO<sub>3</sub> + isoprene SOA yield analysis, for which key yield-related data is presented in Table 1. For each plume, the delta-values listed indicate the difference between in-plume and outside-plume background in average observed concentration. After each plume number, the numbers of points averaged for isoprene and AMS, respectively, are listed. Plume numbers annotated with \* indicate brief plumes for which only single-point measurements of in-plume aerosol composition were possible.

| plume number<br>[#isop/#AMS]                  | 7/2/13 plume<br>time (UTC) | $\Delta\text{ORG}_{\text{aero}}$<br>( $\mu\text{g m}^{-3}$ ) | $\Delta\text{NH}_{4,\text{aero}}$<br>( $\mu\text{g m}^{-3}$ ) | $\Delta\text{SO}_{4,\text{aero}}$<br>( $\mu\text{g m}^{-3}$ ) | Temp<br>(C) | %RH  | Isop:MT<br>Mole<br>Ratio |
|-----------------------------------------------|----------------------------|--------------------------------------------------------------|---------------------------------------------------------------|---------------------------------------------------------------|-------------|------|--------------------------|
| Typical variability ( $\mu\text{g m}^{-3}$ ): |                            | 0.75                                                         | 0.1                                                           | 0.5                                                           |             |      |                          |
| 1<br>[2/3]                                    | 2:18                       | 0.35                                                         | 0                                                             | 0                                                             | 23.6        | 66.5 | 36.5                     |
| 2<br>[*]                                      | 2:20                       | 0.89                                                         | 0.3                                                           | 1.91                                                          | 23.6        | 65   | 71.4                     |
| 3<br>[4/5]                                    | 2:21                       | 1.25                                                         | 1.05                                                          | 5.14                                                          | 23.6        | 65.2 | 16.6                     |
| 4<br>[*]                                      | 3:03                       | 0.16                                                         | 0.08                                                          | 0.7                                                           | 21.2        | 68.1 | 50.6                     |
| 5<br>[3/4]                                    | 3:55                       | 0.32                                                         | 0.26                                                          | 6.07                                                          | 21.9        | 65.5 | 34.2                     |
| 6<br>[2/2]                                    | 4:34                       | 0.57                                                         | 0.3                                                           | 1.12                                                          | 19.9        | 74.6 | 17.3                     |
| 7<br>[5/6]                                    | 4:37                       | 1.05                                                         | 0.22                                                          | 0.65                                                          | 19.7        | 76.2 | 14.2                     |
| 8<br>[2/3]                                    | 4:39                       | 1.26                                                         | 0.44                                                          | 1.18                                                          | 18.3        | 82.2 | 11.0                     |
| 9<br>[7/8]                                    | 5:04                       | 1.45                                                         | 0.35                                                          | 1.9                                                           | 17.2        | 84.8 | 17.8                     |

## Box model calculations

Box model simulations were performed using the Dynamically Simple Model of Atmospheric Chemical Complexity (DSMACC, [http://wiki.seas.harvard.edu/geos-chem/index.php/DSMACC\\_chemical\\_box\\_model](http://wiki.seas.harvard.edu/geos-chem/index.php/DSMACC_chemical_box_model)), containing the Master Chemical Mechanism v3.3.1 chemistry scheme (<http://mcm.leeds.ac.uk/MCM/>). The model approach is similar to that described in detail in Edwards et al. 2017, and the accompanying supplement, with the model run over a 9.5 hour night to simulate the nocturnal residual layer. For the nocturnal simulation used in this work (for both the plume lifetime calculation and the peroxy radical lifetime analysis

in Sect. 4.3) the model was initialized with concentrations of the constraining species representative of the SENEX observations (Table S4). As the model is simulating power plant plume evolution from point of emission, a starting NO mixing ratio of 10 ppb was used to constrain NO<sub>x</sub>, and the chemistry scheme was subsequently allowed to partition the reactive nitrogen. The top panels in Figure S7 show the evolution of key species during this nocturnal simulation.

**Table S4:** Species constrained (MCM v3.3.1 names) during model simulations and constraining values. Constraint column indicates if species concentrations were held at the constrained value throughout the simulation (Fixed) or allowed to vary after initialization (Initial).

| Species  | Mixing ratio | Units | Constraint |
|----------|--------------|-------|------------|
| NO       | 9.28         | ppb   | Initial    |
| O3       | 55.72        | ppb   | Initial    |
| CO       | 134.00       | ppb   | Fixed      |
| CH4      | 1920.00      | ppb   | Fixed      |
| C5H8     | 2606.80      | ppt   | Initial    |
| APINENE  | 38.87        | ppt   | Initial    |
| BPINENE  | 195.50       | ppt   | Initial    |
| LIMONENE | 12.42        | ppt   | Initial    |
| MACR     | 454.13       | ppt   | Initial    |
| MVK      | 1006.00      | ppt   | Initial    |
| IC4H10   | 47.00        | ppt   | Fixed      |
| NC4H10   | 128.00       | ppt   | Fixed      |
| C2H6     | 1199.00      | ppt   | Fixed      |
| C2H4     | 117.00       | ppt   | Fixed      |
| C2H2     | 145.00       | ppt   | Fixed      |
| NC6H14   | 20.00        | ppt   | Fixed      |
| IC5H12   | 120.00       | ppt   | Fixed      |
| NC5H12   | 76.00        | ppt   | Fixed      |
| C3H8     | 344.00       | ppt   | Fixed      |
| C3H6     | 26.00        | ppt   | Fixed      |
| CH3COCH3 | 2556.00      | ppt   | Fixed      |
| BENZENE  | 35.90        | ppt   | Fixed      |
| C2H5OH   | 2239.00      | ppt   | Fixed      |
| MEK      | 309.00       | ppt   | Fixed      |
| CH3OH    | 5560.00      | ppt   | Fixed      |

The daytime simulation used for comparison in Sect. 4.3 of the main manuscript (lower panels of Figure S7) uses the same initialization as the nocturnal simulation; with the only difference being the model is run during the daytime. Photolysis rates are calculated using TUV (<https://www2.aom.ucar.edu/modeling/tropospheric-ultraviolet-and-visible-tuv-radiation-model>). The daytime simulation does not accurately simulate daytime mixing ratios of species such as O<sub>3</sub> representative of SENEX observations. However, the intent of this simulation is to compare model daytime peroxy radical fate and lifetime with the nocturnal simulation. The presence of intense convective mixing in the daytime planetary boundary layer of the Southeast US makes accurately modeling these concentrations difficult with a zero dimensional model.

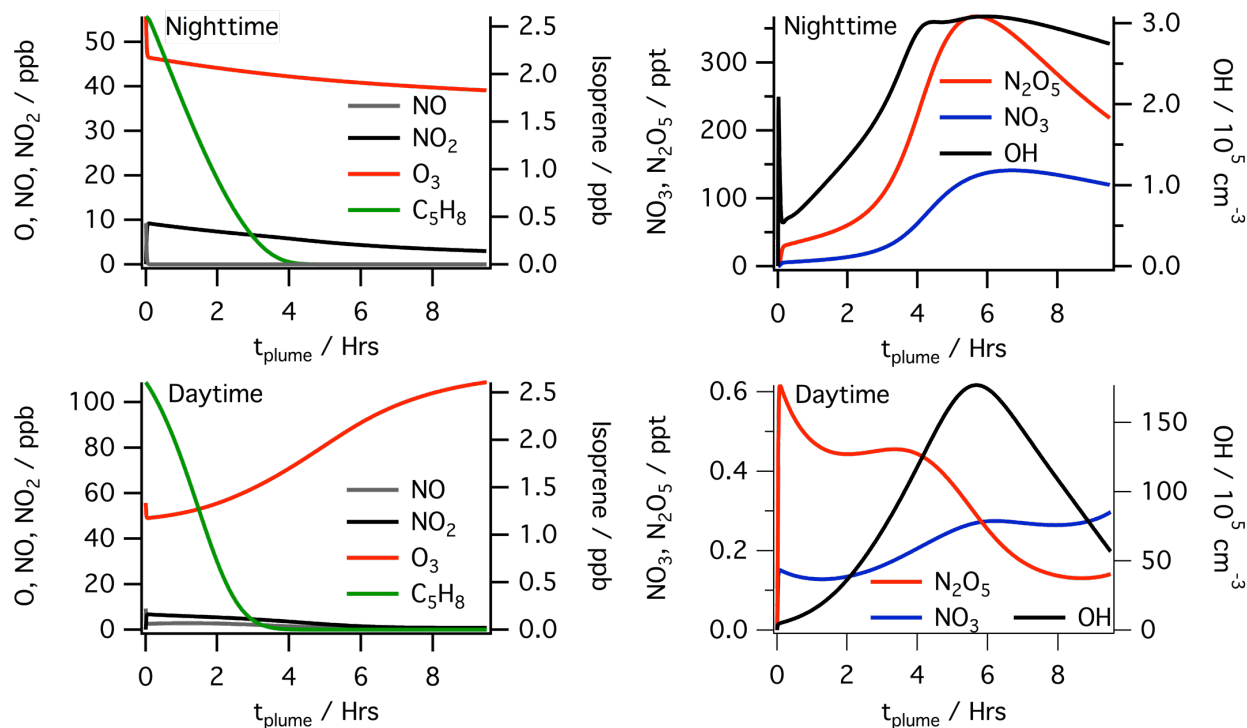

**Fig. S6.** Model calculated NO, NO<sub>2</sub>, O<sub>3</sub>, and isoprene (left) and NO<sub>3</sub>, N<sub>2</sub>O<sub>5</sub> and OH (right for the nocturnal (top) and daytime (bottom) simulations shown in Sect. 4.3.

### Additional considerations investigated via RO<sub>2</sub> fate box modeling

Based on the potentially larger than previously estimated contribution of RO<sub>2</sub>+RO<sub>2</sub> reactions at night, we considered a related possible source of a high bias in the determined SOA yields. If NO<sub>3</sub> reaction with the major daytime isoprene oxidation products MVK and/or MACR produces RO<sub>2</sub> radicals that can cross-react with NO<sub>3</sub> + isoprene products to produce condensable products, this would be a mechanism of recruiting isoprene-derived organic mass into the aerosol, but that original isoprene oxidation would not be counted in the denominator of the yield calculation, since its interaction with NO<sub>3</sub> began as MACR or MVK. In the box model, substantial MVK and MACR are available in the plume at nighttime, but only MACR reacts with NO<sub>3</sub>, and a maximum fraction of one-quarter of MVK+MACR losses go to reaction with NO<sub>3</sub> overnight (see Figure S8). In addition, in our power plant plume observations, MVK+MACR are not observed to be appreciably depleted by the large NO<sub>3</sub> injection, further suggesting that this chemistry is not a substantial additional source of SOA (see Figure S9).

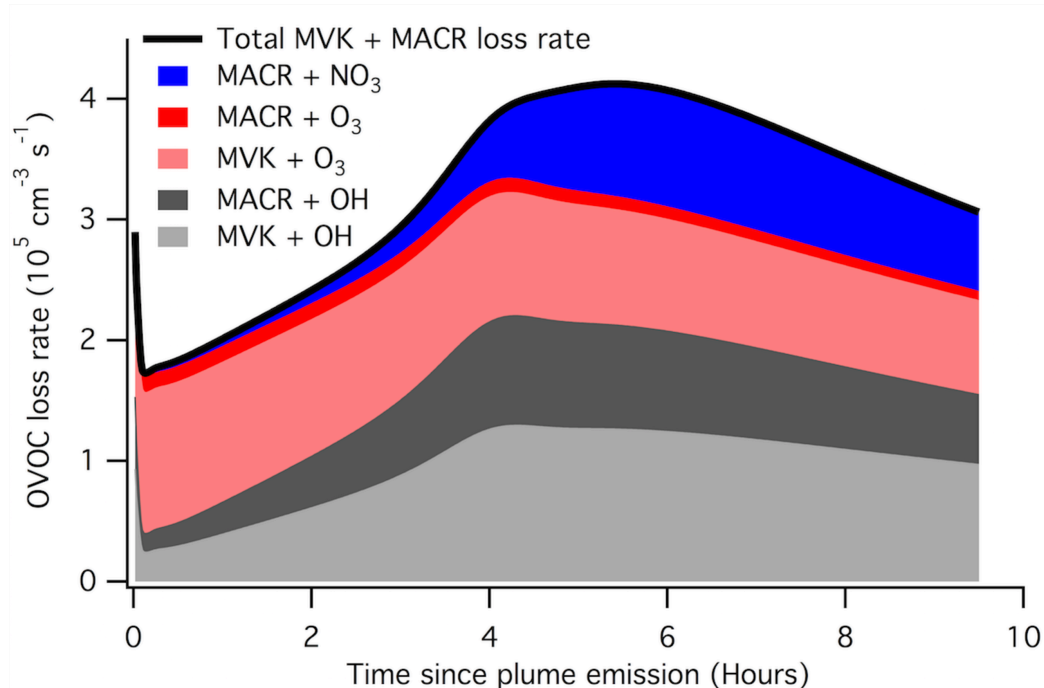

**Figure S7.** Calculated (via MCM) loss rate contributions for the daytime isoprene products methyl vinyl ketone (MVK) and methacrolein (MACR) in the simulated nighttime plume used in the text. Only MACR reacts with  $\text{NO}_3$ , and the contribution of this process to total losses (green stack) is relatively minor.

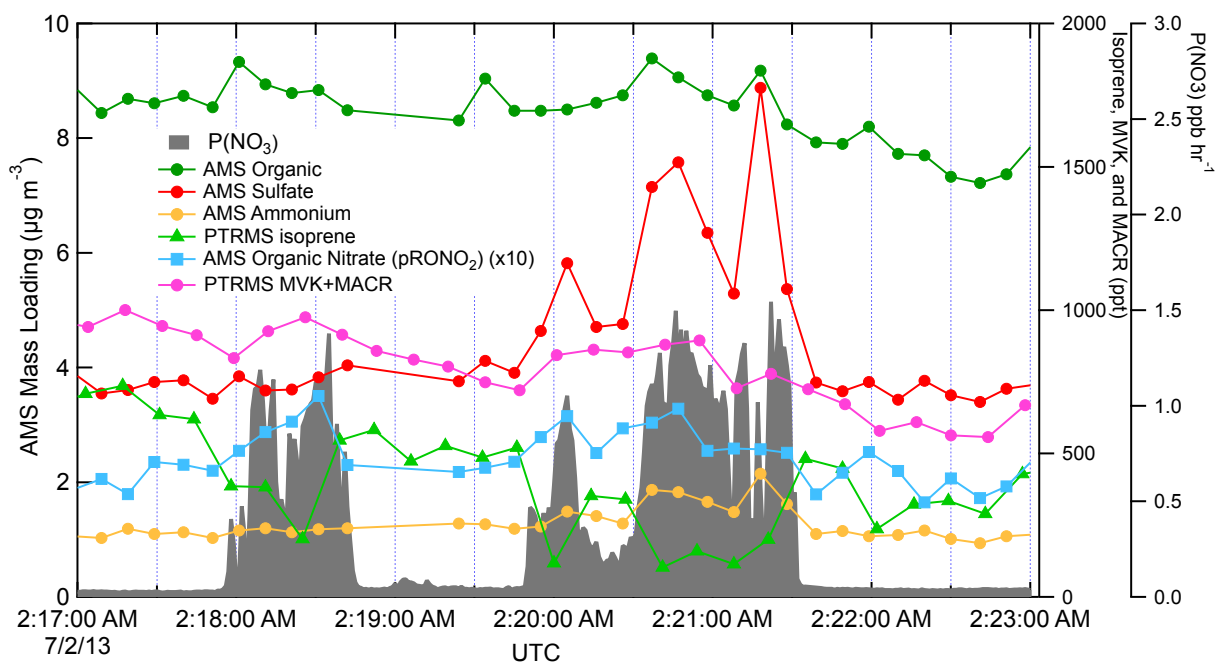

**Figure S8.** MVK and MACR are not titrated on the timescale of these yield estimates in power plant plumes.
